# Supplementary material for: Drivers’ Braking Behavior Affected by Cognitive Distractions: An Experimental Investigation with a Virtual Car Simulator
Source: Behav Sci (Basel). 2020 Oct 1;10(10):150. doi: 10.3390/bs10100150 (PMC7599599; doi:10.3390/bs10100150)
Supplement: Supplementary file 1 [file behavsci-10-00150-s001.xlsx]

## Sheet: Table S1
Table S1. Features parameters of the participants' braking maneuvres.
Partecipant	Age	Gender	IQ level	Group	Vi	LVi	TTZd	Vb	LVb	LVmin	σ(Vn)
	[years]	(1 = female; 0 = male)	(fron Raven test)	(1 = Experimental; 0 = Control )	[m/s]	[m]	[s]	[m/s]	[m]	[m]	[-]
1	20	1	27	0	12.3974	49.0245	3.95442	11.4242	27.3375	13.8842	3.31352
2	29	1	33	1	11.4566	68.1637	5.94974	10.9405	45.7293	9.8513	4.73878
3	24	0	31	1	9.72078	55.3108	5.68996	9.60807	50.4794	8.5229	4.95648
4	21	1	29	0	11.7949	52.2716	4.43172	10.9261	37.8186	13.793	3.00635
5	20	1	34	1	8.501	33.5596	3.94773	7.9608	29.3896	10.0024	4.95608
6	23	1	30	0	7.62375	61.0543	8.00843	7.00165	46.2764	6.47386	4.25959
7	23	1	34	0	10.7829	23.4183	2.17179	10.2607	18.0769	6.35851	2.68453
8	22	1	29	0	9.6806	66.9482	6.91571	8.28828	39.5762	7.56567	3.81029
9	25	0	33	0	7.77603	46.7368	6.01036	7.47819	37.2432	7.32789	4.61195
10	24	0	34	1	11.5546	56.3435	4.87629	10.2194	25.4351	4.90137	4.78158
11	26	0	36	1	11.7186	60.3439	5.14941	10.1697	24.4613	3.75935	5.06079
12	25	0	33	1	11.3195	65.3464	5.77289	9.48294	20.9958	6.10213	4.01176
13	25	0	32	0	11.3382	43.3365	3.82217	10.3559	26.7759	13.8643	3.00119
14	25	0	35	1	9.85065	63.7041	6.46699	7.95309	23.4416	8.38786	4.76787
15	23	1	33	1	9.24798	53.2503	5.75805	8.02421	31.1833	8.72858	3.6147
16	24	1	28	1	11.0276	42.3967	3.84461	10.1061	13.6476	4.06236	3.8219
17	26	1	28	1	11.174	43.832	3.92266	10.3731	25.6671	14.1997	3.7969
18	23	0	35	0	11.6397	43.8058	3.76349	10.4961	24.591	6.86834	4.39629
19	24	0	32	0	12.0531	72.2516	5.99443	11.7625	57.3593	6.46248	3.51159
20	24	0	31	0	10.9302	78.4158	7.17422	10.6701	67.6049	5.52487	4.42788
21	25	0	34	1	12.0833	58.0475	4.80392	11.2819	41.5195	10.9812	4.53974
22	25	0	32	1	9.91367	51.5671	5.20162	9.17809	22.7998	6.91951	4.14998
23	20	1	31	1	13.2675	60.4959	4.55971	12.2618	38.0701	11.2629	4.09456
24	24	0	32	0	10.7896	38.9691	3.61173	10.7012	36.8178	13.662	4.51242
25	26	1	34	0	9.13853	48.8971	5.35065	8.79426	37.6401	4.5334	4.25006
26	23	0	35	0	10.6091	64.2417	6.05531	9.42753	33.1667	10.7581	3.67656
27	23	0	34	0	9.40734	70.3594	7.4792	6.59804	17.0706	8.86646	2.96954
28	20	1	33	1	9.12653	85.9265	9.41503	6.80063	46.9291	9.80414	3.75978
29	20	1	33	1	11.7074	71.8316	6.13559	7.70227	22.7538	12.6876	4.50764
30	23	0	32	1	10.8804	61.6976	5.67052	9.49103	36.1494	10.5586	4.384
31	24	0	33	0	8.604	64.8934	7.54223	6.56755	15.7719	10.4948	4.46721
32	24	0	32	1	9.03489	36.7657	4.0693	8.5518	19.4981	8.49062	3.69962
33	25	1	36	0	10.4185	69.5516	6.67577	8.9396	40.9151	7.38872	3.19374
34	22	1	32	0	14.6856	48.7458	3.31929	14.1994	37.8303	9.88	4.92352
35	23	0	36	1	8.15563	45.6922	5.60253	7.05508	18.5852	11.2827	5.26199
36	29	0	36	1	10.0585	33.1524	3.29596	9.72868	26.1908	5.90607	5.42017
37	25	1	34	0	10.4386	65.4954	6.27432	10.2245	57.7263	9.16791	4.38526
38	22	1	32	1	11.2013	66.0212	5.89408	10.8684	56.052	14.7068	5.03701
39	22	0	35	1	9.15587	60.5567	6.61398	6.70074	22.096	7.33762	4.76663
40	22	0	35	1	7.04283	36.8927	5.23833	6.29993	22.0073	15.0134	3.92928
41	26	1	36	1	10.4207	85.1224	8.1686	8.00428	32.5849	10.1631	4.73453
42	24	0	31	1	7.77158	28.4361	3.65898	6.2642	11.8695	7.87761	5.20148
43	25	0	36	1	7.61279	25.8829	3.39992	7.27481	23.9961	6.28917	4.12324
44	26	0	34	1	11.9272	64.0379	5.36906	11.2514	35.1976	11.5322	4.60113
45	22	0	32	1	10.4501	46.4343	4.44345	9.43258	24.1902	12.4713	4.0996
46	25	0	34	1	8.24871	33.8845	4.10785	7.51682	20.0888	6.82646	3.46521
47	26	0	33	1	11.593	79.3913	6.8482	10.9975	52.2341	9.15959	4.03168
48	20	0	36	1	7.82657	54.2767	6.93493	6.11451	15.7498	11.0089	4.57614
49	30	1	34	1	12.4688	38.365	3.07689	11.5613	26.0904	12.9452	5.72639
50	30	0	36	1	9.98886	52.6477	5.27064	9.16801	39.151	6.09789	4.70863
51	25	0	30	1	7.09915	58.2278	8.20207	6.21703	14.552	7.44504	3.30607
52	22	0	34	1	9.58315	32.6538	3.40742	8.80166	19.0458	7.70802	3.61207
53	27	0	35	1	9.32242	57.8861	6.20934	7.75275	21.0946	6.60959	4.84155
54	26	1	34	1	10.2266	55.7668	5.45313	9.39342	27.5417	6.465	4.3774
55	29	1	36	1	8.65985	18.4736	2.13325	7.44785	16.3876	10.8504	3.6457
56	23	0	33	1	8.86733	63.8449	7.20001	8.60491	53.8137	6.8152	4.71392
57	21	1	33	1	10.8103	65.934	6.09919	10.1462	38.4743	9.61848	3.60338
58	21	1	35	1	9.59658	55.8913	5.82408	8.67301	35.2236	6.05797	5.24903
59	21	0	36	0	10.3763	50.9065	4.90603	10.2401	43.6954	10.3446	2.97116
60	21	1	34	0	8.64852	91.6528	10.5975	5.22979	9.74909	6.62214	3.24035
61	22	0	33	0	10.225	68.9724	6.74545	9.43654	54.1977	14.8233	4.25188
62	21	1	33	1	9.89313	43.5711	4.40418	9.74556	41.1088	8.15062	3.02908
63	23	1	34	1	11.0494	65.4457	5.92302	10.1356	38.5295	9.60168	3.8991
64	23	0	36	0	10.3579	85.9762	8.30051	8.3463	44.3962	9.59454	5.14361
65	23	0	36	0	13.4707	51.4483	3.81927	12.971	34.9161	6.78897	5.76577
66	21	0	33	0	10.7357	76.1087	7.08932	9.39053	50.8983	8.9038	3.48738
67	27	0	34	0	9.76018	44.536	4.56303	8.54575	22.0865	9.96145	2.92854
68	22	1	33	1	7.88674	40.7317	5.16458	7.52971	35.7262	11.2349	3.15052
69	21	1	36	0	12.0577	63.3092	5.25052	11.5901	51.4401	8.62948	2.93926
70	23	0	34	1	8.03319	21.4563	2.67095	7.78346	19.468	6.25524	4.02071
71	22	1	35	1	8.32466	52.3055	6.2832	7.06105	21.106	5.88833	3.37502
72	25	0	34	1	9.82348	49.1407	5.00237	9.23176	28.4048	14.4504	3.02794
73	22	1	31	1	9.11146	30.548	3.3527	8.48797	21.6715	6.76146	3.19874
74	22	0	35	1	7.56195	44.9304	5.94165	6.31191	17.1792	9.27546	3.70995
75	24	0	36	1	8.16476	28.8061	3.5281	7.89446	20.7857	9.87888	3.63709
76	27	0	33	1	9.1585	63.7389	6.95953	7.03627	18.3502	8.55091	4.15175
77	28	1	36	1	8.22274	55.4044	6.73795	5.78904	11.6734	7.83685	3.15028
78	28	1	36	1	9.18275	22.6875	2.47067	8.70923	20.421	8.20238	3.74765
